# Supplementary material
Source: publisher figshare collection journal article supplement (https://tandf.figshare.com/articles/dataset/_/5645449)

**Supplemental Figure 1.** Cohort level and meta-analysis QQ plots and genomic control values for single SNP and gene-based tests.

1. Framingham Heart Study

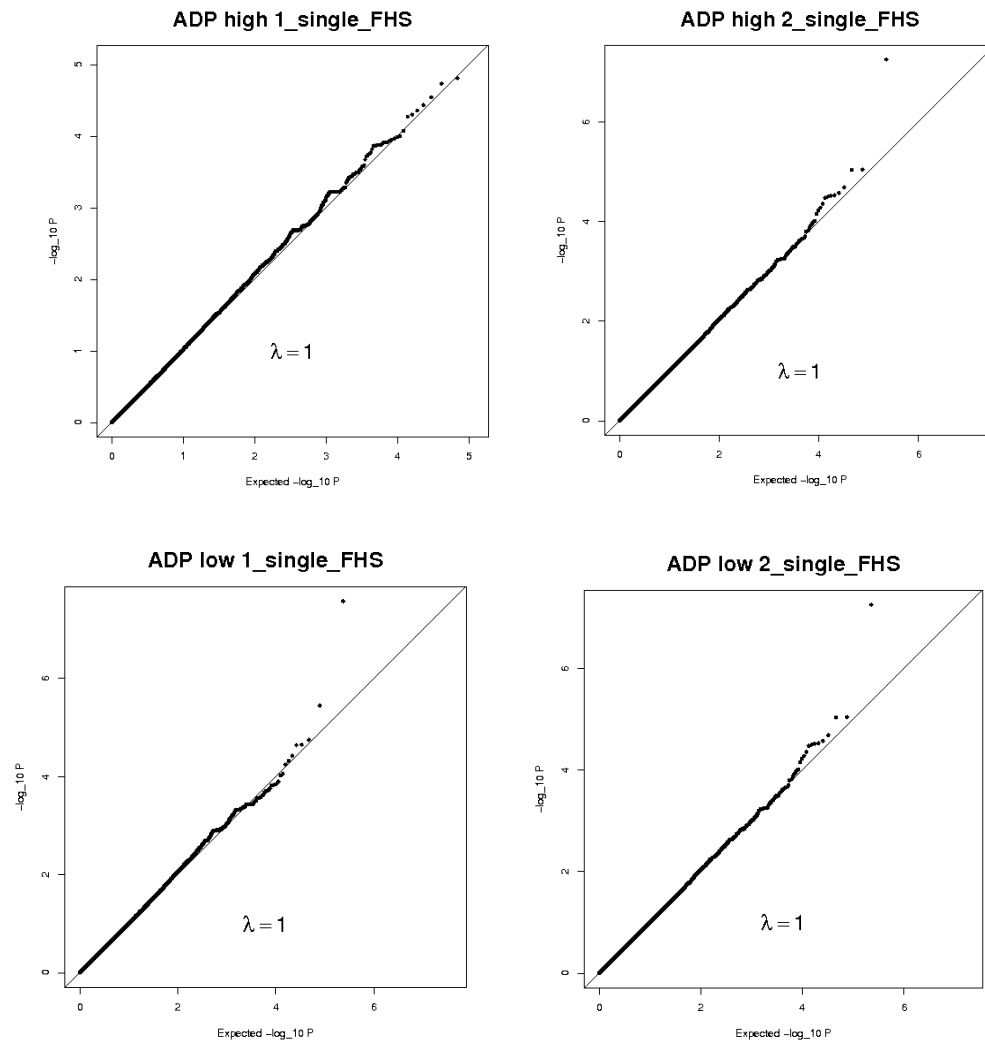

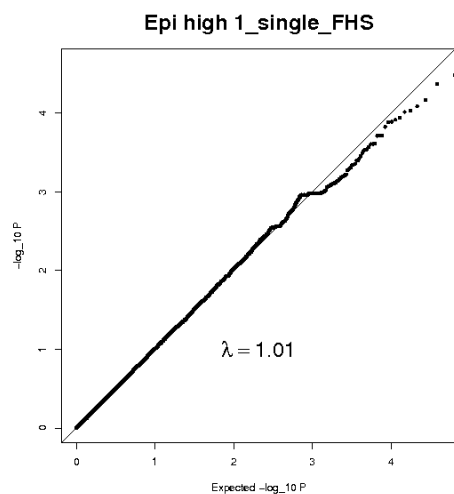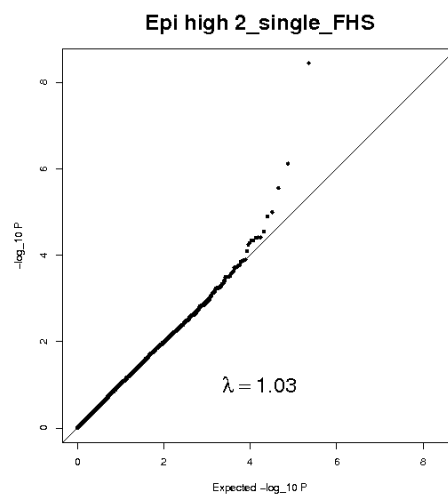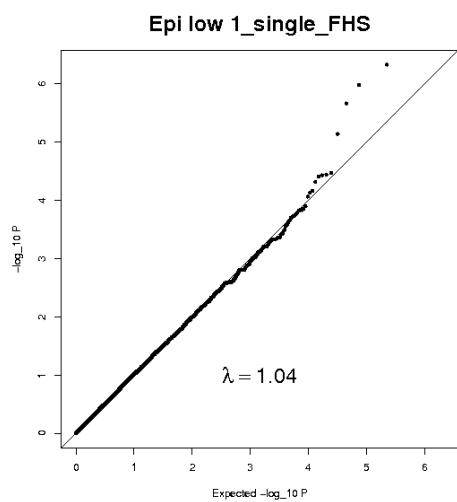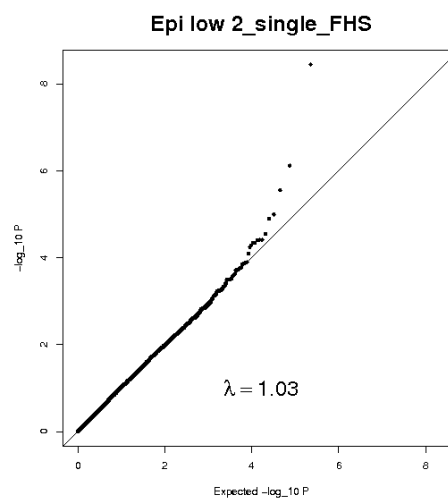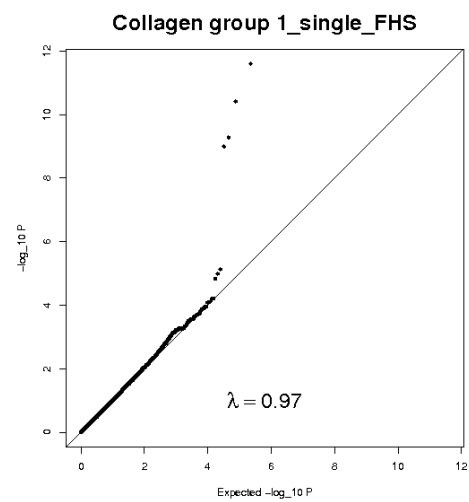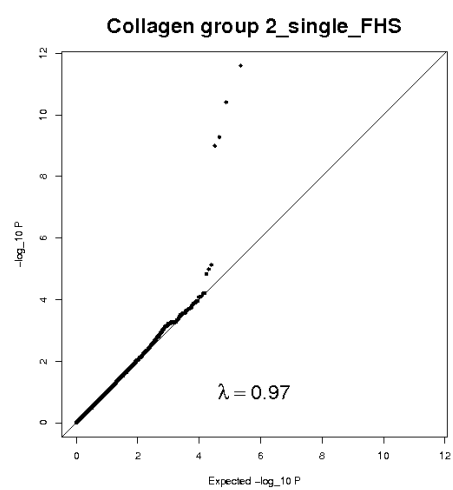

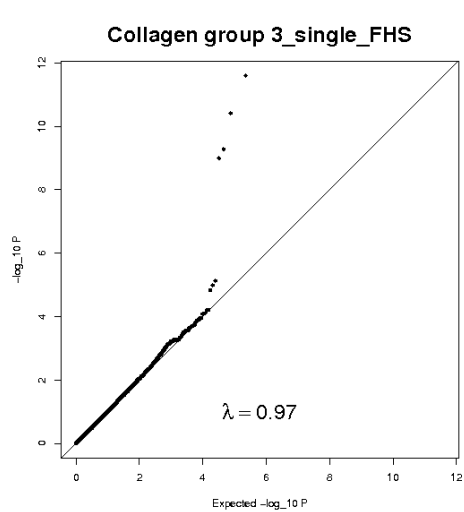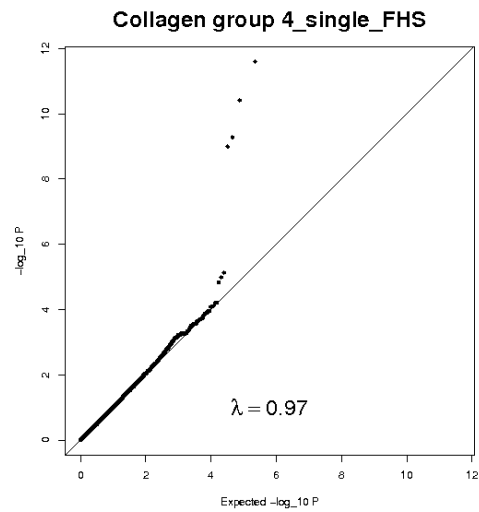

## 2. GeneSTAR

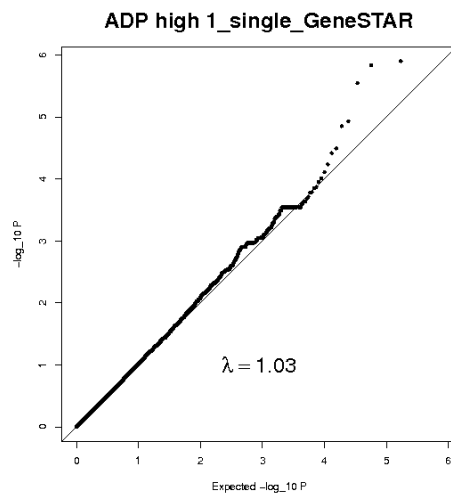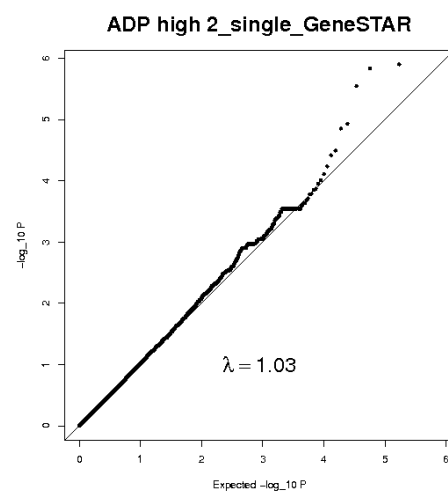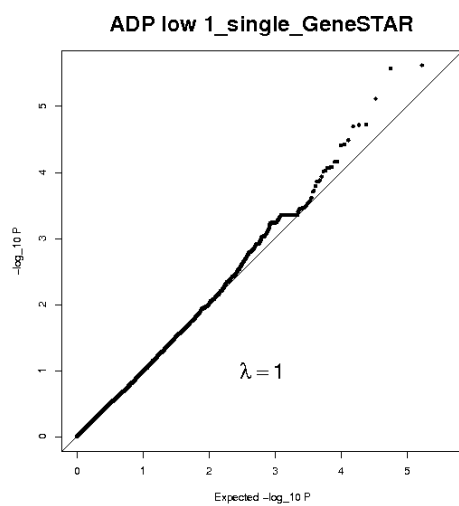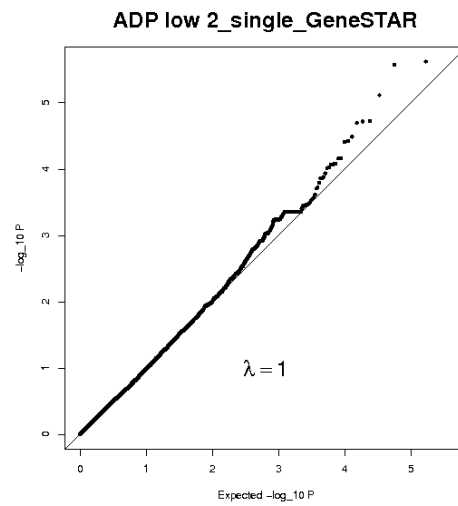

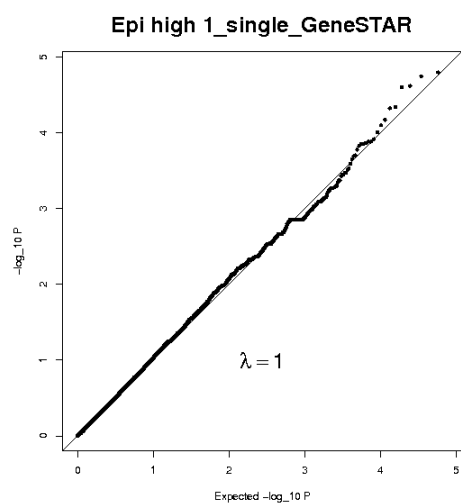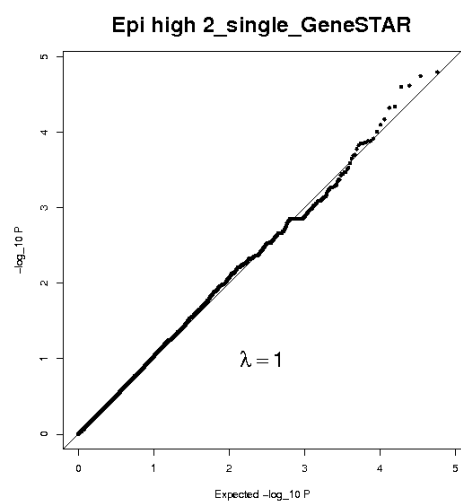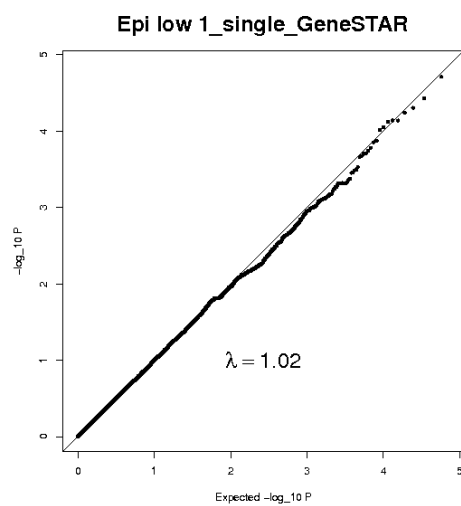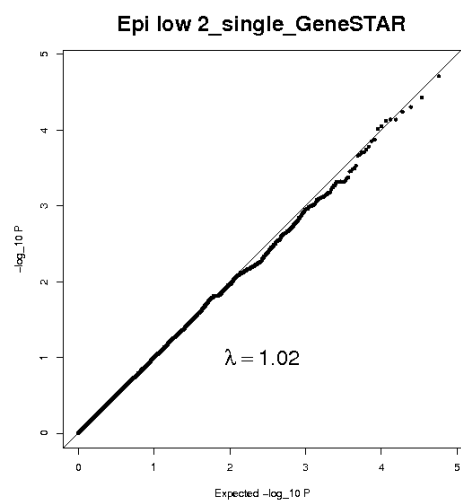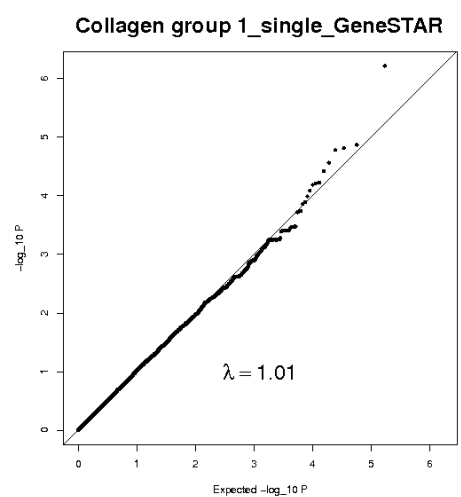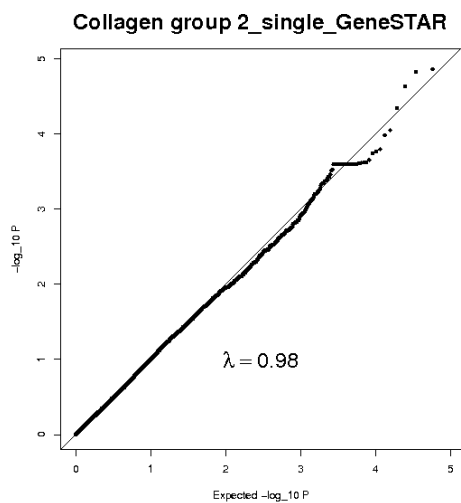

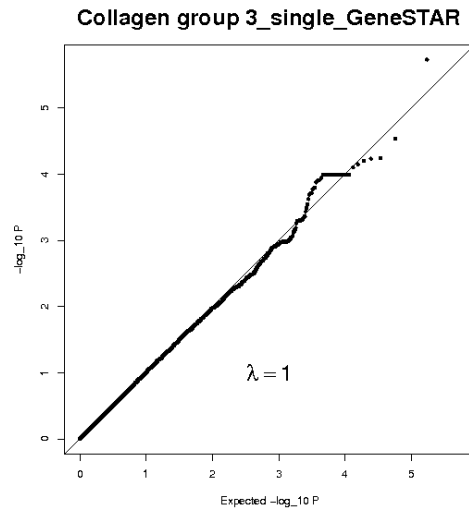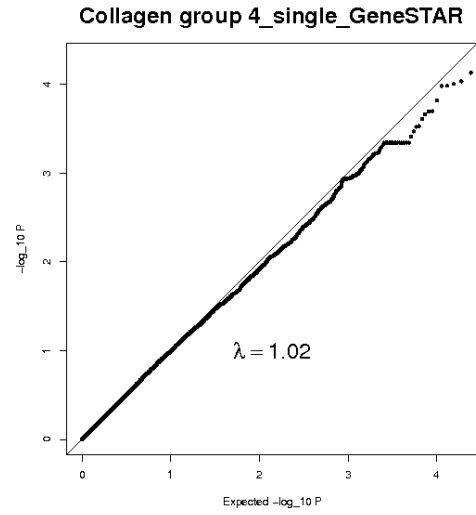

### 3. PAPI

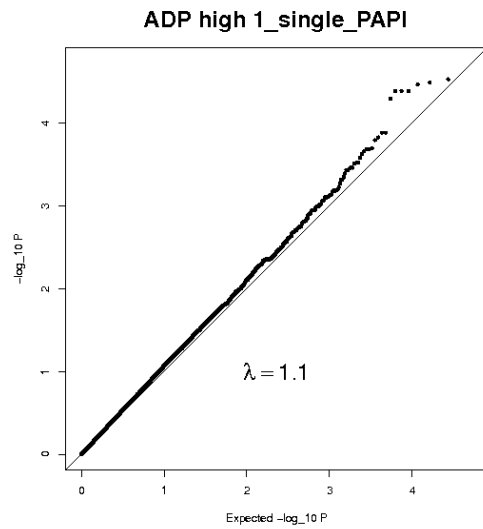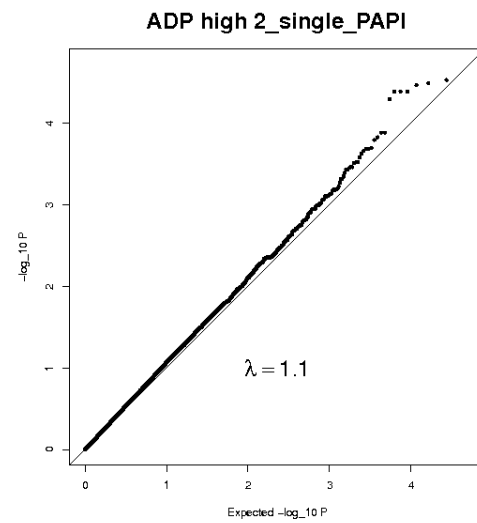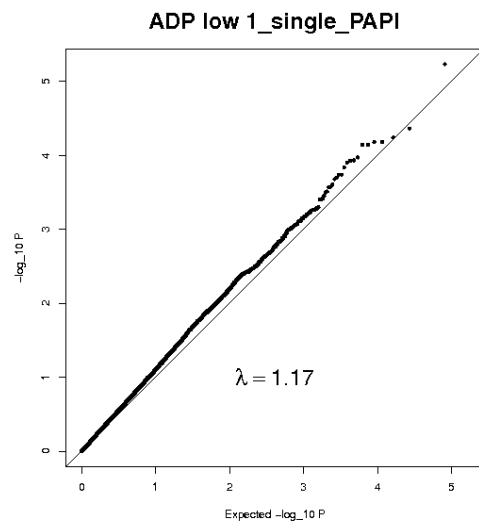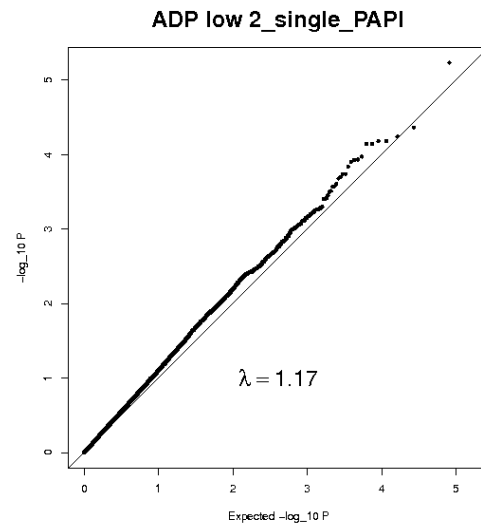

Epi high 1\_single\_PAPI

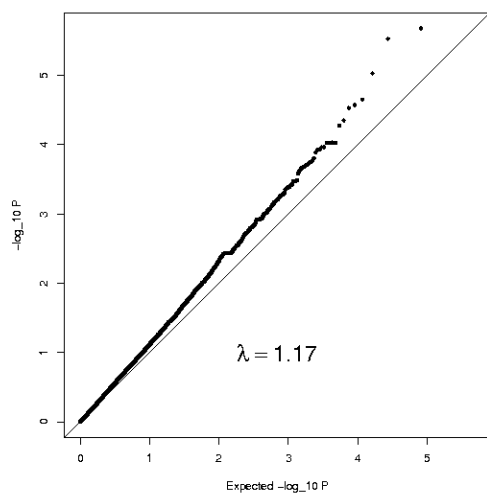

Epi high 2\_single\_PAPI

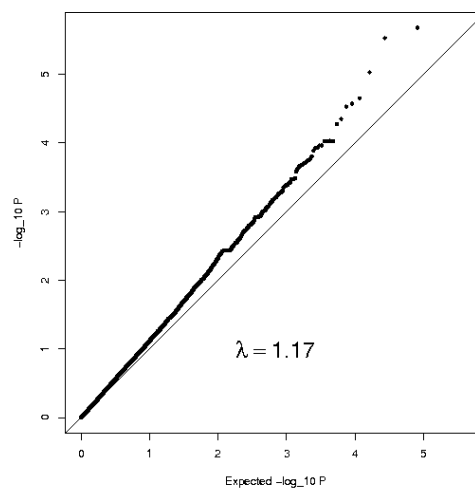

Epi low 1\_single\_PAPI

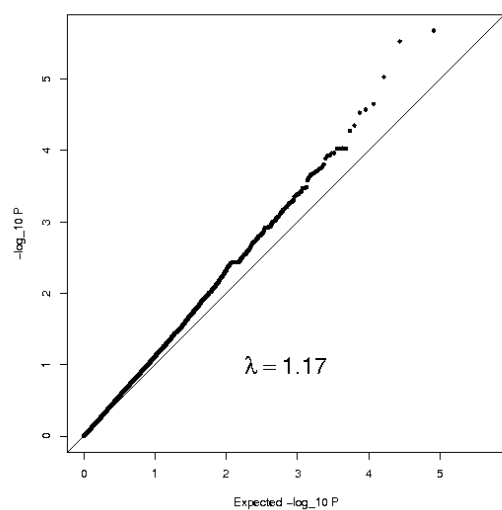

Epi low 2\_single\_PAPI

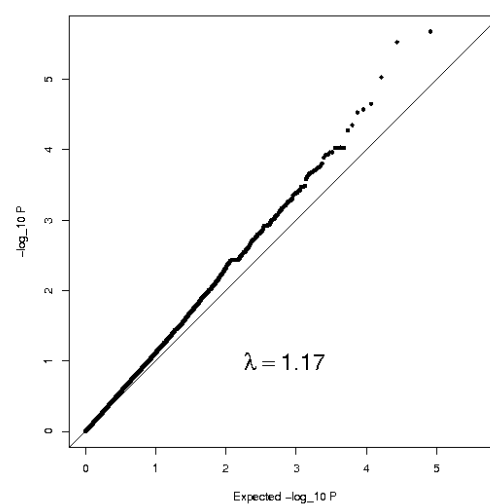

Collagen group 1\_single\_PAPI

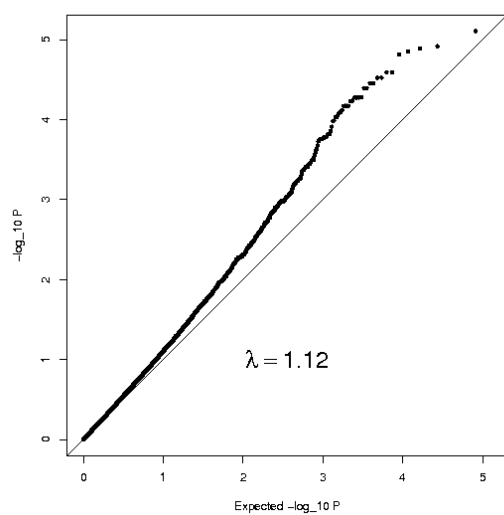

Collagen group 2\_single\_PAPI

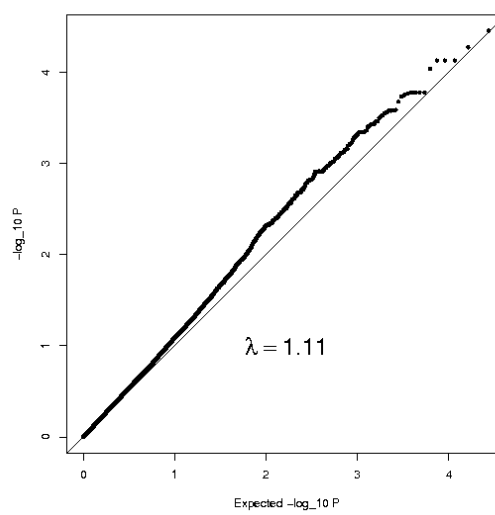

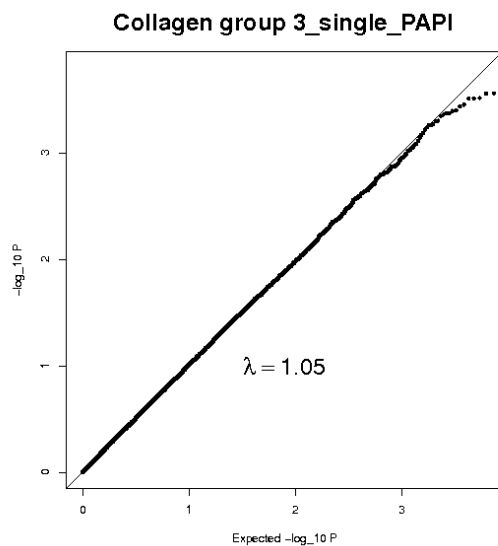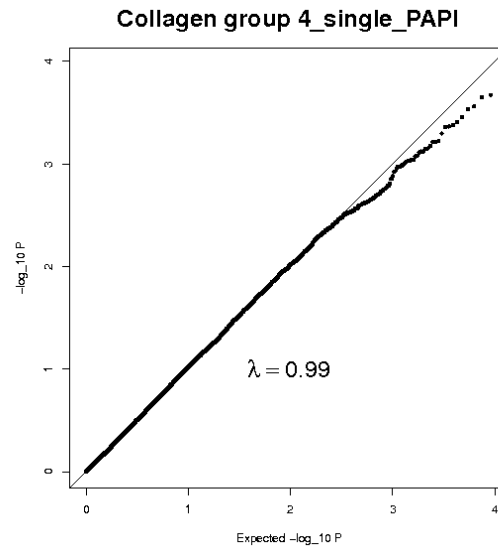

#### 4. Single SNP meta-analysis

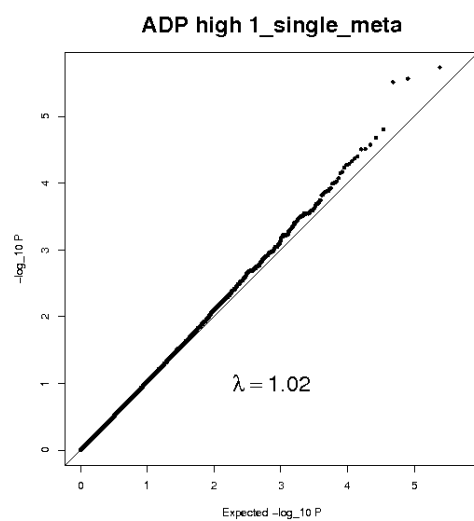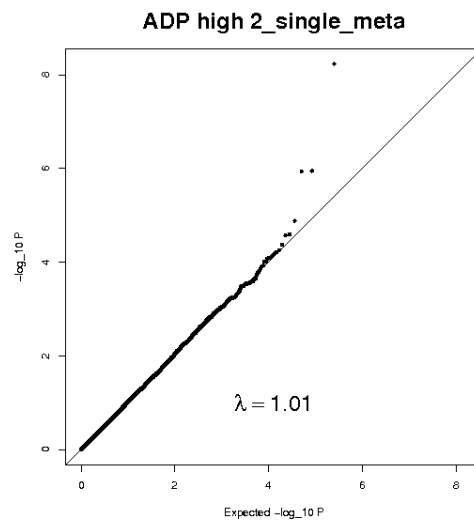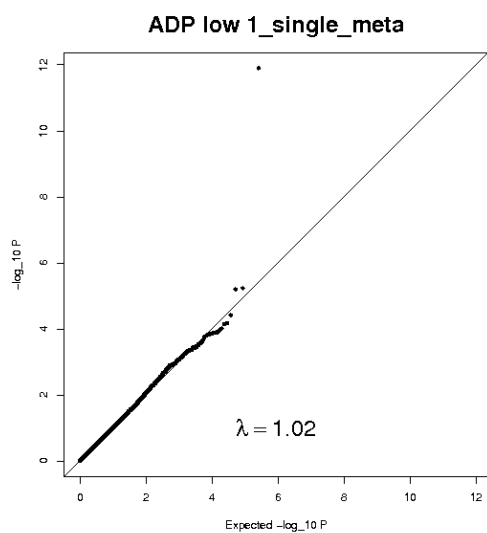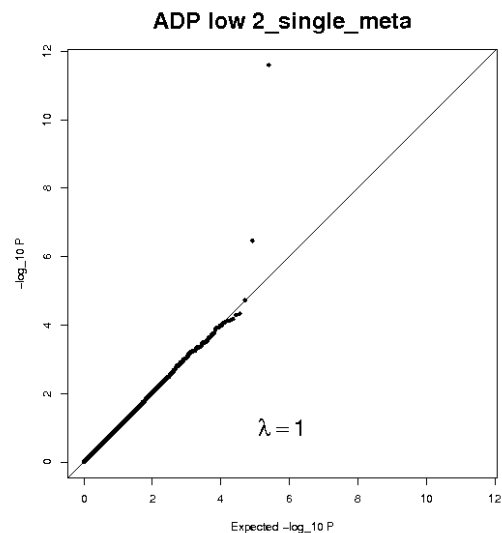

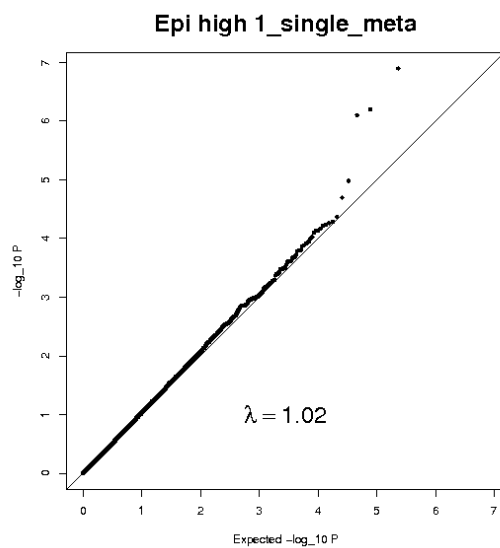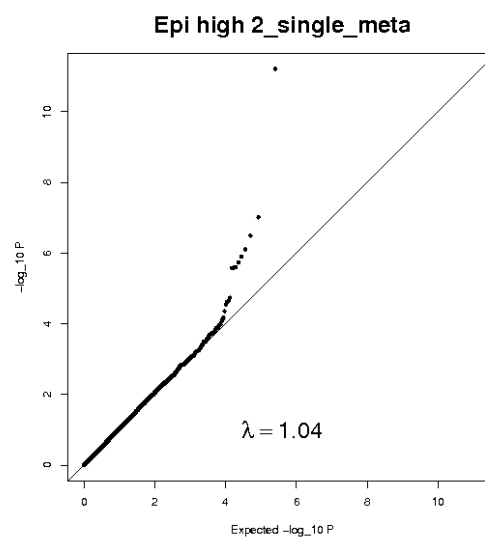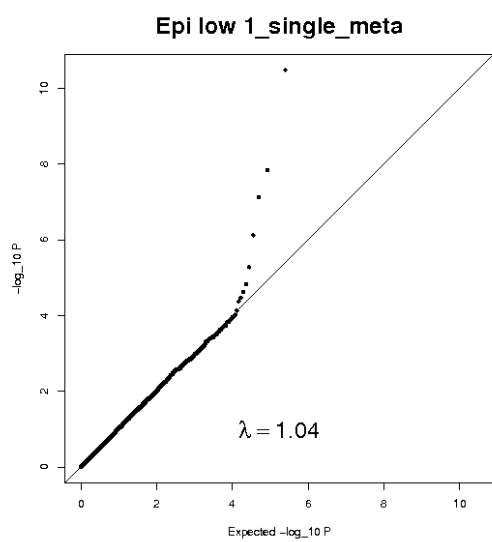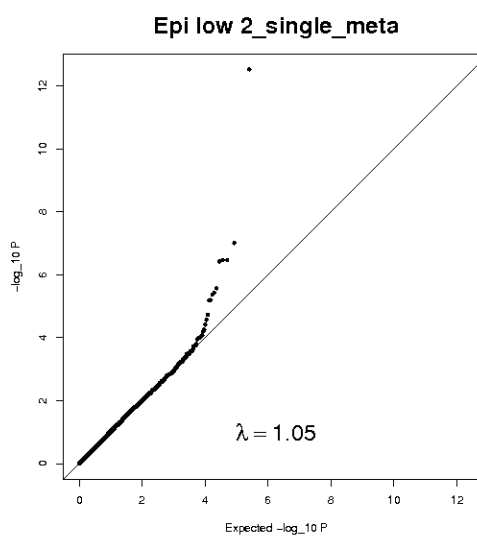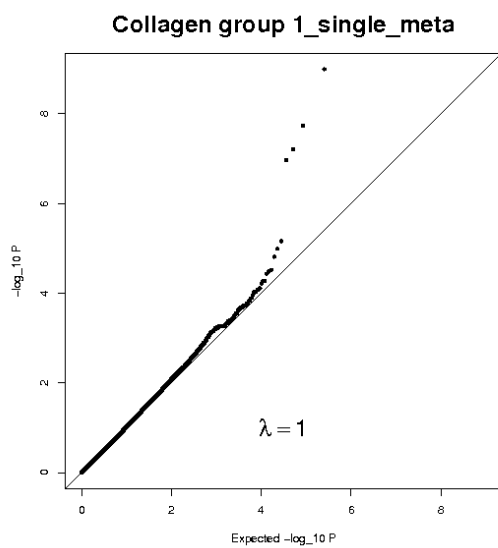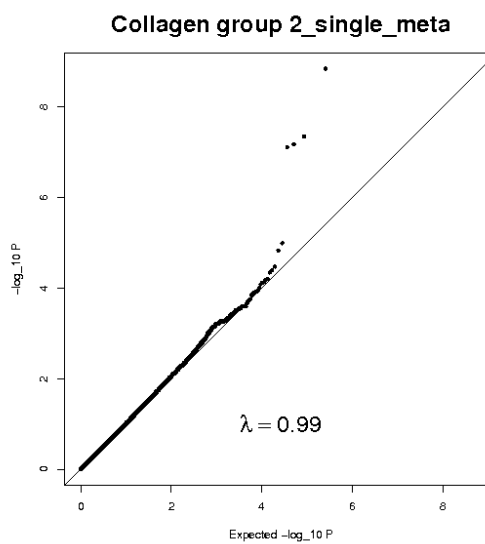



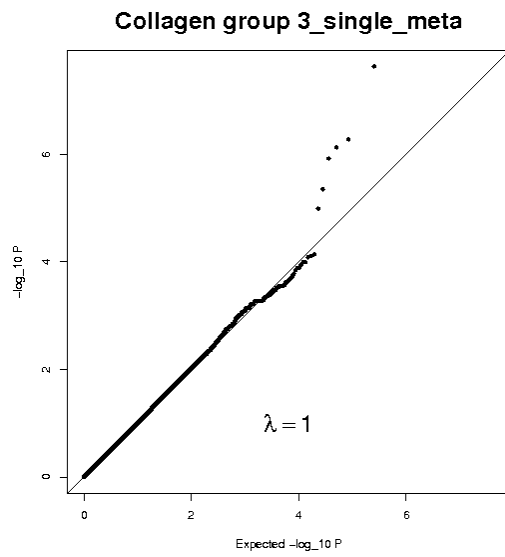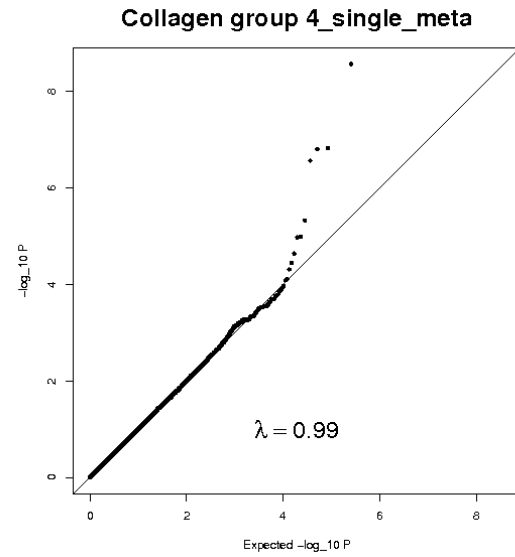

## 5. VT meta-analysis

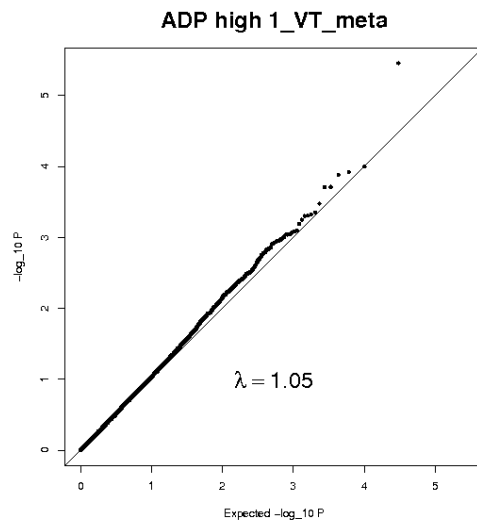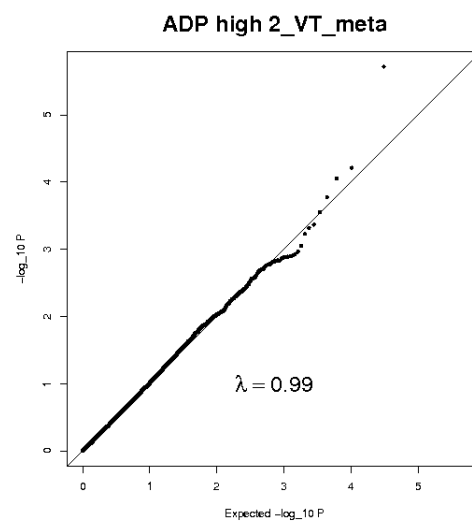

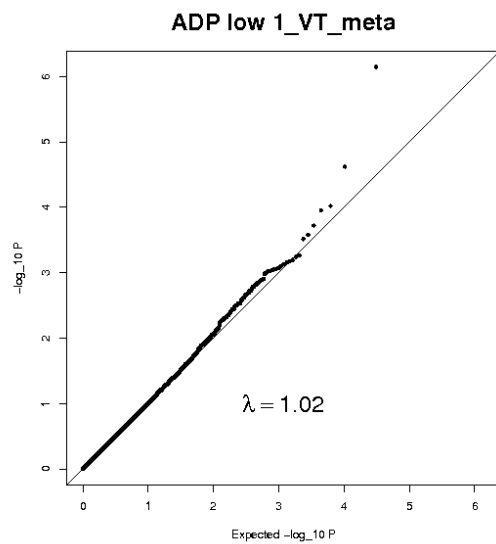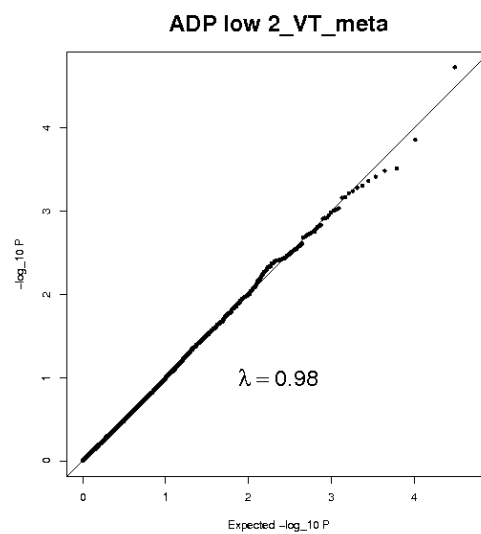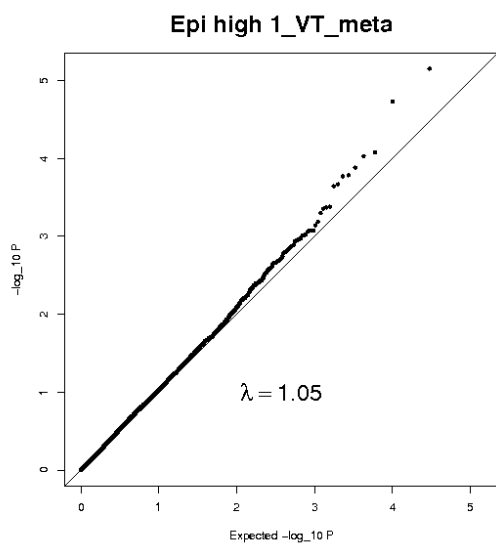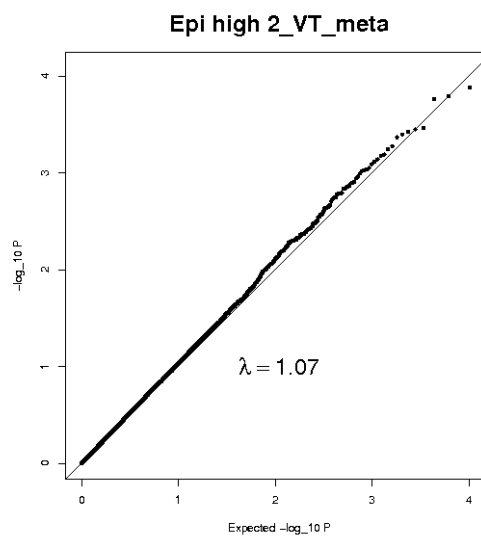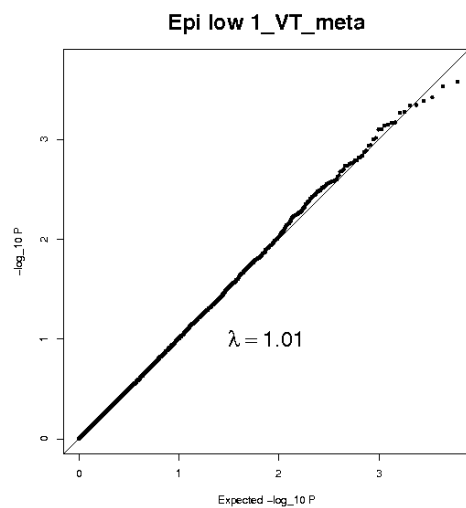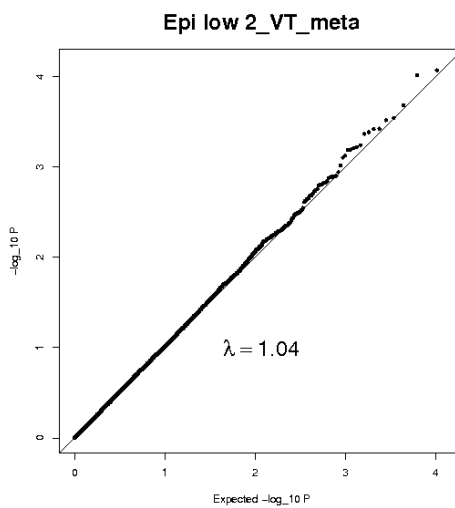

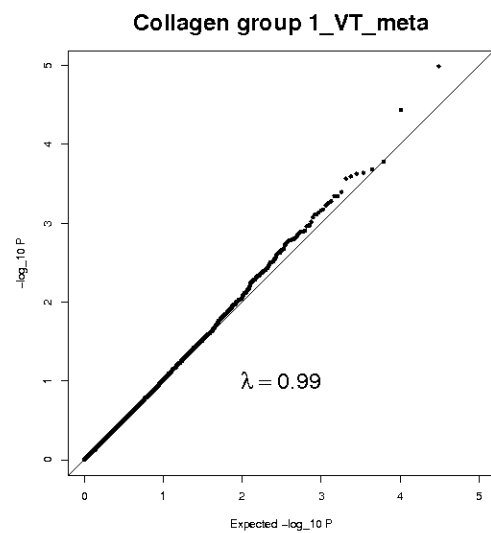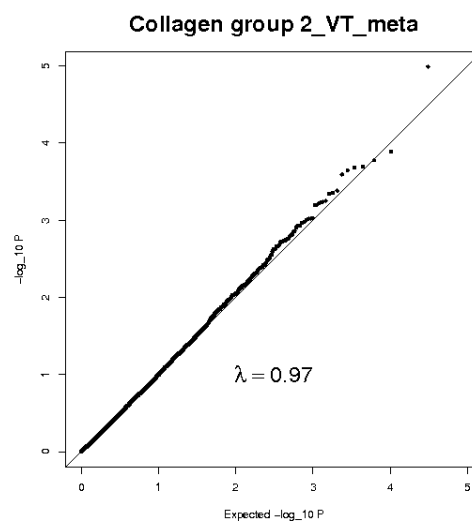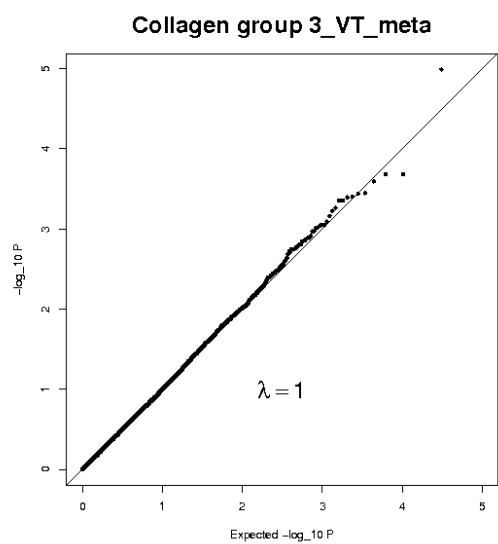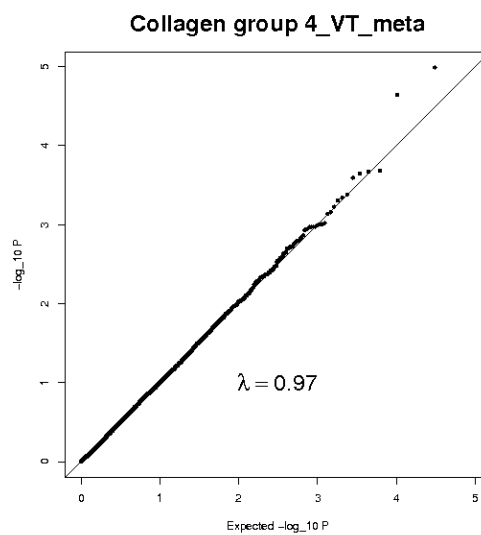

## 6. SKAT meta-analysis

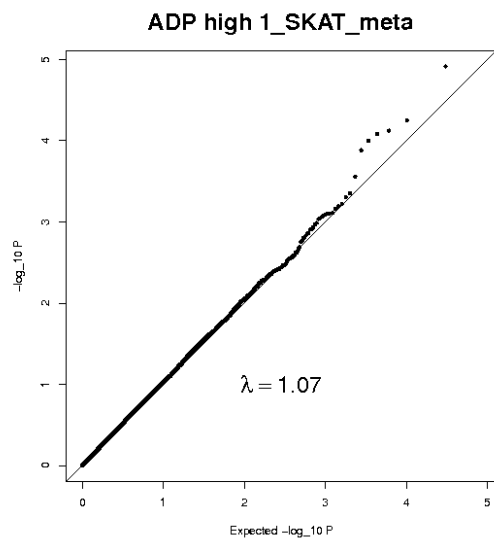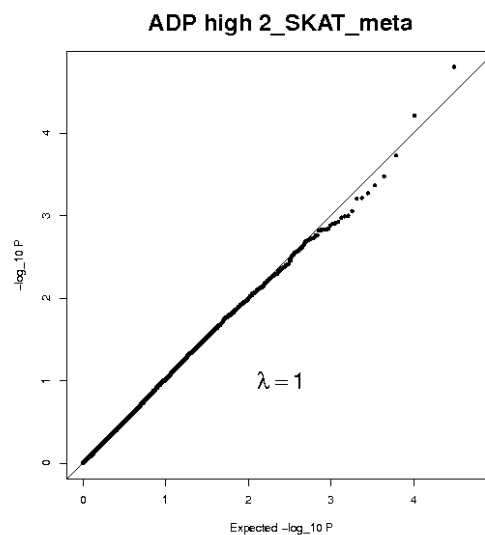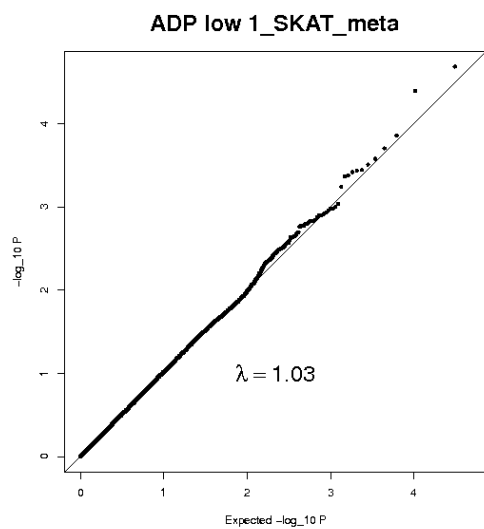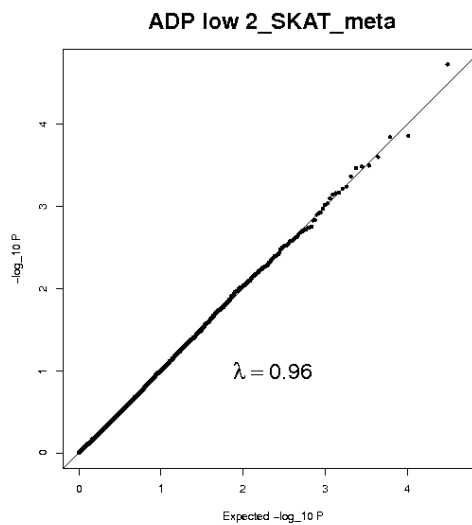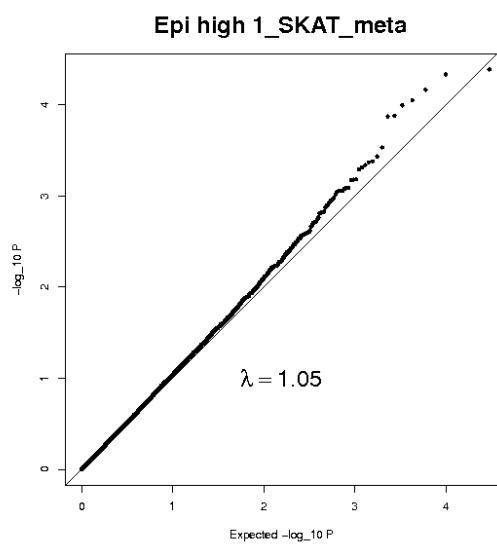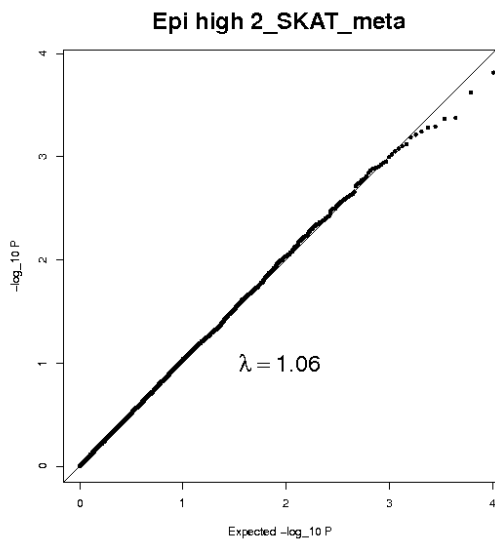

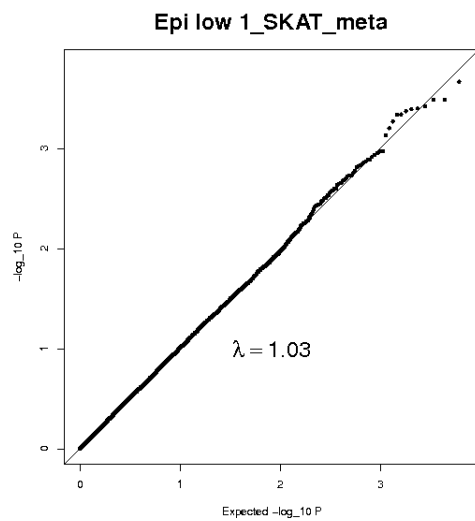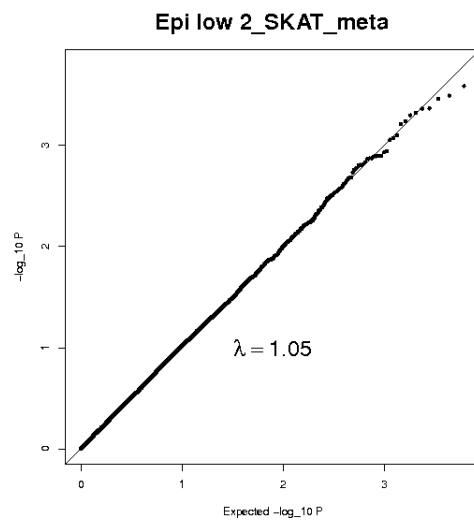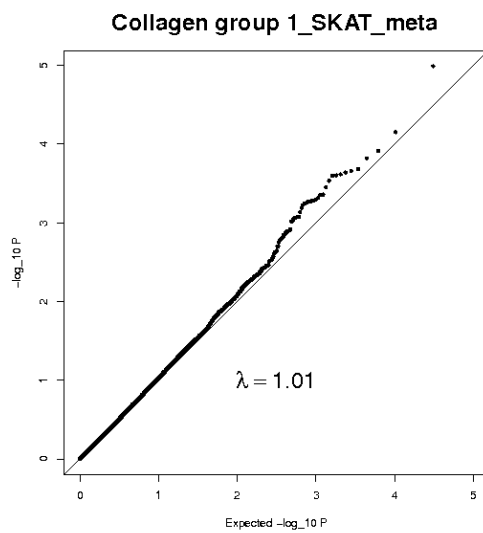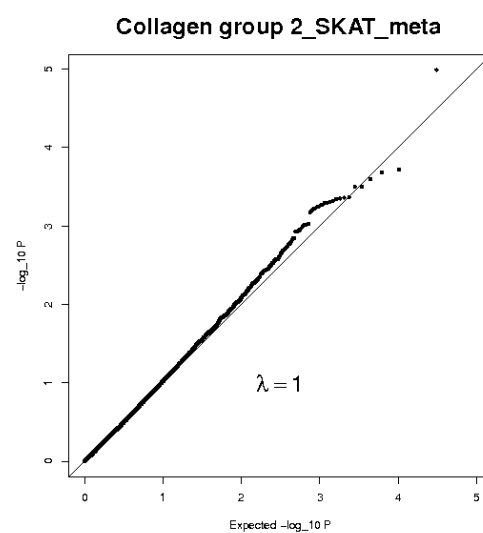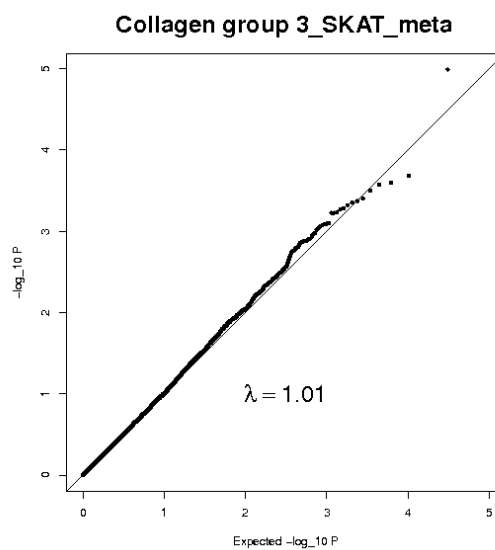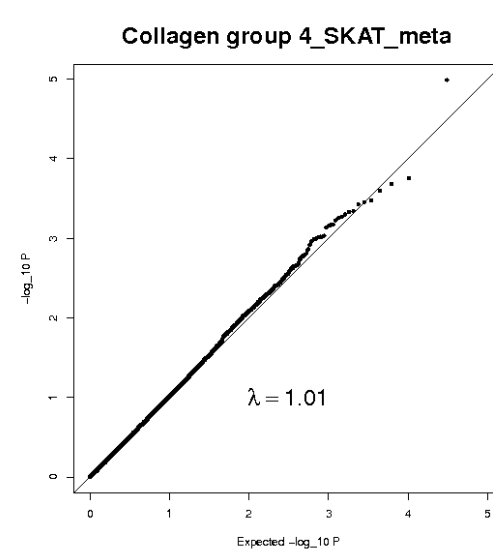

Supplement: Supplementary file 5 [file 1]
