# Supplementary material
Source: publisher figshare collection journal article supplement (https://tandf.figshare.com/articles/dataset/_/5645449)
Supplement: Supplementary file 1 [file 1]

**Supplemental Table 4.** SNV known or suggestive signals (P<7.0E-06).

| phenotype  | dbSNPID    | chr:pos      | SKATgene                                           | snp annotation | Ref | Alt | N    | EAF   | beta   | se    | direction | pval     |
|------------|------------|--------------|----------------------------------------------------|----------------|-----|-----|------|-------|--------|-------|-----------|----------|
| Epi low 2  | rs12566888 | 1:156869047  | <i>PEAR1</i>                                       | intronic       | G   | T   | 3797 | 0.094 | -0.291 | 0.040 | ---       | 2.98E-13 |
| ADP low 1  | rs12566888 | 1:156869047  | <i>PEAR1</i>                                       | intronic       | G   | T   | 4047 | 0.098 | -0.271 | 0.038 | ---       | 1.26E-12 |
| ADP low 2  | rs12566888 | 1:156869047  | <i>PEAR1</i>                                       | intronic       | G   | T   | 3697 | 0.095 | -0.283 | 0.040 | ---       | 2.53E-12 |
| Epi hgh 2  | rs12566888 | 1:156869047  | <i>PEAR1</i>                                       | intronic       | G   | T   | 3798 | 0.094 | -0.275 | 0.040 | ---       | 6.15E-12 |
| Epi low 1  | rs12566888 | 1:156869047  | <i>PEAR1</i>                                       | intronic       | G   | T   | 3607 | 0.096 | -0.269 | 0.041 | ---       | 3.27E-11 |
| Collagen 1 | rs1671152  | 19:55526345  | <i>GP6</i>                                         | nonsynonymous  | T   | G   | 3753 | 0.835 | -0.199 | 0.033 | ++        | 1.01E-09 |
| Collagen 2 | rs1671152  | 19:55526345  | <i>GP6</i>                                         | nonsynonymous  | T   | G   | 3753 | 0.835 | -0.198 | 0.033 | ---       | 1.44E-09 |
| Collagen 4 | rs1671152  | 19:55526345  | <i>GP6</i>                                         | nonsynonymous  | T   | G   | 3742 | 0.835 | -0.194 | 0.033 | ++        | 2.71E-09 |
| ADP high 2 | rs12566888 | 1:156869047  | <i>PEAR1</i>                                       | intronic       | G   | T   | 3794 | 0.095 | -0.232 | 0.040 | ---       | 5.84E-09 |
| Epi low 1  | rs4545476  | 10:112922409 | <i>exm2249039</i><br>(nearest<br><i>ADRA2A</i> )   | intergenic     | C   | T   | 3607 | 0.375 | -0.144 | 0.025 | ---       | 1.44E-08 |
| Collagen 1 | rs1613662  | 19:55536595  | <i>GP6</i>                                         | nonsynonymous  | G   | A   | 3753 | 0.832 | -0.181 | 0.032 | ++        | 1.82E-08 |
| Collagen 3 | rs1671152  | 19:55526345  | <i>GP6</i>                                         | nonsynonymous  | T   | G   | 3753 | 0.835 | -0.181 | 0.032 | ++        | 2.33E-08 |
| Collagen 2 | rs1654413  | 19:55526359  | <i>GP6</i>                                         | nonsynonymous  | A   | T   | 3753 | 0.820 | -0.173 | 0.032 | ---       | 4.55E-08 |
| Collagen 1 | rs1654413  | 19:55526359  | <i>GP6</i>                                         | nonsynonymous  | A   | T   | 3753 | 0.820 | -0.170 | 0.031 | ++        | 6.25E-08 |
| Collagen 2 | rs2304167  | 19:55527081  | <i>GP6</i>                                         | nonsynonymous  | C   | T   | 3753 | 0.820 | -0.170 | 0.032 | ---       | 6.66E-08 |
| Epi low 1  | rs869244   | 10:112909105 | <i>exm-rs869244</i><br>(nearest<br><i>ADRA2A</i> ) | intergenic     | G   | A   | 3607 | 0.330 | -0.140 | 0.026 | ---       | 7.59E-08 |
| Collagen 2 | rs1613662  | 19:55536595  | <i>GP6</i>                                         | nonsynonymous  | G   | A   | 3753 | 0.832 | -0.174 | 0.032 | ---       | 7.84E-08 |
| Epi hgh 2  | rs10761731 | 10:65027610  | <i>JMJD1C</i>                                      | intronic       | A   | T   | 3798 | 0.428 | 0.129  | 0.024 | ++        | 9.72E-08 |
| Epi low 2  | rs869244   | 10:112909105 | <i>exm-rs869244</i><br>(nearest<br><i>ADRA2A</i> ) | intergenic     | G   | A   | 3797 | 0.331 | -0.135 | 0.025 | ---       | 9.77E-08 |
| Collagen 1 | rs2304167  | 19:55527081  | <i>GP6</i>                                         | nonsynonymous  | C   | T   | 3753 | 0.820 | -0.167 | 0.031 | ++        | 1.06E-07 |
| Collagen 4 | rs1654413  | 19:55526359  | <i>GP6</i>                                         | nonsynonymous  | A   | T   | 3742 | 0.820 | -0.165 | 0.031 | ++        | 1.51E-07 |

|            |            |              |                                                    |               |   |   |      |       |        |       |     |          |
|------------|------------|--------------|----------------------------------------------------|---------------|---|---|------|-------|--------|-------|-----|----------|
| Collagen 4 | rs1613662  | 19:55536595  | <i>GP6</i>                                         | nonsynonymous | G | A | 3742 | 0.832 | -0.169 | 0.032 | --- | 1.58E-07 |
| Collagen 4 | rs2304167  | 19:55527081  | <i>GP6</i>                                         | nonsynonymous | C | T | 3742 | 0.820 | -0.162 | 0.031 | --- | 2.72E-07 |
| Epi hgh 2  | rs342293   | 7:106372219  | <i>exm-rs342293</i><br>(nearest <i>PIK3CG</i> )    | intergenic    | C | G | 3798 | 0.435 | -0.121 | 0.024 | --- | 3.24E-07 |
| Epi low 2  | rs342293   | 7:106372219  | <i>exm-rs342293</i><br>(nearest <i>PIK3CG</i> )    | intergenic    | C | G | 3797 | 0.435 | -0.121 | 0.024 | --- | 3.33E-07 |
| Epi low 2  | rs10761731 | 10:65027610  | <i>JMJD1C</i>                                      | intronic      | A | T | 3797 | 0.428 | 0.123  | 0.024 | ++- | 3.35E-07 |
| Epi low 2  | rs4545476  | 10:112922409 | <i>exm2249039</i><br>(nearest <i>ADRA2A</i> )      | intergenic    | C | T | 3797 | 0.377 | -0.126 | 0.025 | --- | 3.78E-07 |
| Collagen 3 | rs1613662  | 19:55536595  | <i>GP6</i>                                         | nonsynonymous | G | A | 3753 | 0.832 | -0.161 | 0.032 | --- | 5.29E-07 |
| Epi high 1 | rs4909945  | 11:10673739  | <i>MRVII</i>                                       | nonsynonymous | T | C | 2730 | 0.659 | -0.149 | 0.030 | --- | 6.28E-07 |
| Collagen 3 | rs1654413  | 19:55526359  | <i>GP6</i>                                         | nonsynonymous | A | T | 3753 | 0.820 | -0.155 | 0.031 | --- | 7.45E-07 |
| Epi low 1  | rs2914908  | 5:117982046  | <i>exm2270115</i><br>(nearest <i>RPL11-2N5.2</i> ) | intergenic    | C | T | 3607 | 0.490 | 0.120  | 0.024 | +++ | 7.57E-07 |
| Epi hgh 2  | rs4909945  | 11:10673739  | <i>MRVII</i>                                       | nonsynonymous | T | C | 3798 | 0.665 | -0.126 | 0.026 | --- | 7.87E-07 |
| Epi high 1 | rs7940646  | 11:10669228  | <i>MRVII</i>                                       | intronic      | T | C | 2730 | 0.658 | -0.148 | 0.030 | --- | 7.88E-07 |
| ADP high 2 | rs6943029  | 7:155762157  | <i>exm-rs6943029</i><br>(nearest <i>SHH</i> )      | intergenic    | G | A | 3794 | 0.072 | 0.222  | 0.046 | +++ | 1.13E-06 |
| ADP high 2 | rs2263316  | 6:31421297   | <i>HCP5</i>                                        | intergenic    | A | G | 3794 | 0.650 | 0.123  | 0.025 | +++ | 1.15E-06 |
| Collagen 3 | rs2304167  | 19:55527081  | <i>GP6</i>                                         | nonsynonymous | C | T | 3753 | 0.820 | -0.152 | 0.031 | --- | 1.20E-06 |
| Epi hgh 2  | rs7940646  | 11:10669228  | <i>MRVII</i>                                       | intronic      | T | C | 3798 | 0.664 | -0.124 | 0.025 | --- | 1.25E-06 |
| Epi hgh 2  | rs10761779 | 10:65274927  | <i>JMJD1C</i>                                      | intergenic    | A | G | 3798 | 0.500 | 0.115  | 0.024 | +++ | 1.82E-06 |
| ADP high 1 | rs7940646  | 11:10669228  | <i>MRVII</i>                                       | intronic      | T | C | 3275 | 0.662 | -0.131 | 0.027 | --- | 1.84E-06 |
| Epi hgh 2  | rs12355784 | 10:65121565  | <i>JMJD1C</i>                                      | intronic      | C | A | 3798 | 0.500 | 0.113  | 0.024 | +++ | 2.54E-06 |
| Epi hgh 2  | rs869244   | 10:112909105 | <i>exm-rs869244</i><br>(nearest <i>ADRA2A</i> )    | intergenic    | G | A | 3798 | 0.330 | -0.120 | 0.025 | --- | 2.61E-06 |

|            |             |              |                                                     |               |   |   |      |       |        |       |     |          |
|------------|-------------|--------------|-----------------------------------------------------|---------------|---|---|------|-------|--------|-------|-----|----------|
| Epi hgh 2  | rs4545476   | 10:112922409 | <i>exm2249039</i><br>(nearest<br><i>ADRA2A</i> )    | intergenic    | C | T | 3798 | 0.377 | -0.116 | 0.025 | --- | 2.61E-06 |
| Epi low 2  | rs10761779  | 10:65274927  | <i>JMJD1C</i>                                       | intergenic    | A | G | 3797 | 0.501 | 0.113  | 0.024 | +++ | 2.67E-06 |
| ADP high 1 | rs4909945   | 11:10673739  | <i>MRVII</i>                                        | nonsynonymous | T | C | 3275 | 0.662 | -0.129 | 0.027 | --- | 2.72E-06 |
| ADP high 1 | rs1052763   | 22:19119751  | <i>TSSK2</i>                                        | nonsynonymous | C | T | 3275 | 0.183 | -0.154 | 0.033 | --- | 3.08E-06 |
| Epi low 2  | rs4909945   | 11:10673739  | <i>MRVII</i>                                        | nonsynonymous | T | C | 3797 | 0.665 | -0.118 | 0.025 | --- | 3.71E-06 |
| Epi low 2  | rs12355784  | 10:65121565  | <i>JMJD1C</i>                                       | intronic      | C | A | 3797 | 0.500 | 0.110  | 0.024 | +++ | 4.26E-06 |
| Collagen 3 | rs7832232   | 8:38469303   | <i>exm-rs7832232</i><br>(nearest<br><i>RNF5P1</i> ) | intergenic    | A | G | 3753 | 0.474 | 0.109  | 0.024 | +++ | 4.48E-06 |
| Collagen 4 | rs7832232   | 8:38469303   | <i>exm-rs7832232</i><br>(nearest<br><i>RNF5P1</i> ) | intergenic    | A | G | 3742 | 0.474 | 0.109  | 0.024 | +++ | 4.70E-06 |
| Epi low 1  | rs144150699 | 3:54952554   | <i>LRTM1</i>                                        | nonsynonymous | G | C | 3058 | 0.001 | 2.073  | 0.455 | =++ | 5.26E-06 |
| ADP low 1  | rs4909945   | 11:10673739  | <i>MRVII</i>                                        | nonsynonymous | T | C | 4047 | 0.668 | -0.113 | 0.025 | --- | 5.81E-06 |
| ADP low 1  | rs7940646   | 11:10669228  | <i>MRVII</i>                                        | intronic      | T | C | 4047 | 0.667 | -0.112 | 0.025 | --- | 6.28E-06 |
| Epi low 2  | rs7940646   | 11:10669228  | <i>MRVII</i>                                        | intronic      | T | C | 3797 | 0.664 | -0.115 | 0.025 | --- | 6.29E-06 |
| Epi low 2  | rs115780313 | 1:34254272   | <i>CSMD2</i>                                        | nonsynonymous | T | C | 3797 | 0.002 | 1.300  | 0.288 | ++= | 6.45E-06 |
| Collagen 1 | rs9267673   | 6:31883679   | <i>C2</i>                                           | intronic      | C | T | 3753 | 0.114 | -0.173 | 0.039 | --- | 6.88E-06 |
