# Supplementary material
Source: publisher figshare collection journal article supplement (https://tandf.figshare.com/articles/dataset/_/5645449)
Supplement: Supplementary file 2 [file 1]

**Supplemental Table 3.** Linkage disequilibrium calculations among *ANKRD26* variants in unrelated individuals in FHS.

| SNP1        | SNP2        | D' | r2       | FisherExact.P |
|-------------|-------------|----|----------|---------------|
| rs146159734 | rs41304587  | 1  | 5.64E-06 | 1             |
| rs146159734 | rs61745662  | 1  | 4.93E-06 | 1             |
| rs146159734 | rs139949439 | 1  | 3.52E-06 | 1             |
| rs146159734 | rs141748831 | 1  | 2.11E-06 | 1             |
| rs146159734 | rs28477279  | 1  | 7.03E-07 | 1             |
| rs146159734 | rs201461870 | 1  | 7.03E-07 | 1             |
| rs146159734 | rs201638257 | 1  | 4.93E-06 | 1             |
| rs146159734 | rs191015656 | 1  | 7.03E-07 | 1             |
| rs146159734 | rs200100926 | NA | NA       | 1             |
| rs146159734 | rs79092403  | 1  | 7.03E-07 | 1             |
| rs41304587  | rs61745662  | 1  | 6.58E-06 | 1             |
| rs41304587  | rs139949439 | 1  | 4.70E-06 | 1             |
| rs41304587  | rs141748831 | 1  | 2.82E-06 | 1             |
| rs41304587  | rs28477279  | 1  | 9.39E-07 | 1             |
| rs41304587  | rs201461870 | 1  | 9.39E-07 | 1             |
| rs41304587  | rs201638257 | 1  | 6.58E-06 | 1             |
| rs41304587  | rs191015656 | 1  | 9.39E-07 | 1             |
| rs41304587  | rs200100926 | NA | NA       | 1             |
| rs41304587  | rs79092403  | 1  | 9.39E-07 | 1             |
| rs61745662  | rs139949439 | 1  | 4.11E-06 | 1             |
| rs61745662  | rs141748831 | 1  | 2.46E-06 | 1             |
| rs61745662  | rs28477279  | 1  | 8.21E-07 | 1             |
| rs61745662  | rs201461870 | 1  | 8.21E-07 | 1             |
| rs61745662  | rs201638257 | 1  | 5.76E-06 | 1             |
| rs61745662  | rs191015656 | 1  | 8.21E-07 | 1             |
| rs61745662  | rs200100926 | NA | NA       | 1             |
| rs61745662  | rs79092403  | 1  | 8.21E-07 | 1             |
| rs139949439 | rs141748831 | 1  | 1.76E-06 | 1             |
| rs139949439 | rs28477279  | 1  | 5.86E-07 | 1             |
| rs139949439 | rs201461870 | 1  | 5.86E-07 | 1             |
| rs139949439 | rs201638257 | 1  | 4.11E-06 | 1             |
| rs139949439 | rs191015656 | 1  | 5.86E-07 | 1             |
| rs139949439 | rs200100926 | NA | NA       | 1             |
| rs139949439 | rs79092403  | 1  | 5.86E-07 | 1             |
| rs141748831 | rs28477279  | 1  | 3.51E-07 | 1             |
| rs141748831 | rs201461870 | 1  | 3.51E-07 | 1             |
| rs141748831 | rs201638257 | 1  | 2.46E-06 | 1             |
| rs141748831 | rs191015656 | 1  | 3.51E-07 | 1             |
| rs141748831 | rs200100926 | NA | NA       | 1             |
| rs141748831 | rs79092403  | 1  | 3.51E-07 | 1             |

|             |             |    |          |   |
|-------------|-------------|----|----------|---|
| rs28477279  | rs201461870 | 1  | 1.17E-07 | 1 |
| rs28477279  | rs201638257 | 1  | 8.21E-07 | 1 |
| rs28477279  | rs191015656 | 1  | 1.17E-07 | 1 |
| rs28477279  | rs200100926 | NA | NA       | 1 |
| rs28477279  | rs79092403  | 1  | 1.17E-07 | 1 |
| rs201461870 | rs201638257 | 1  | 8.21E-07 | 1 |
| rs201461870 | rs191015656 | 1  | 1.17E-07 | 1 |
| rs201461870 | rs200100926 | NA | NA       | 1 |
| rs201461870 | rs79092403  | 1  | 1.17E-07 | 1 |
| rs201638257 | rs191015656 | 1  | 8.21E-07 | 1 |
| rs201638257 | rs200100926 | NA | NA       | 1 |
| rs201638257 | rs79092403  | 1  | 8.21E-07 | 1 |
| rs191015656 | rs200100926 | NA | NA       | 1 |
| rs191015656 | rs79092403  | 1  | 1.17E-07 | 1 |
| rs200100926 | rs79092403  | NA | NA       | 1 |
