# Supplementary material
Source: publisher figshare collection journal article supplement (https://tandf.figshare.com/articles/dataset/_/5645449)
Supplement: Supplementary file 4 [file 1]

**Supplemental Table 1: Harmonizing platelet phenotypes for meta-analysis**

| <b>Agonist</b>                  | <b>Framingham Phenotype<br/>N=2,604</b>                   | <b>GeneSTAR<br/>Phenotype<br/>N=1,060</b>  | <b>PAPI Phenotype<br/>N=549</b>             |
|---------------------------------|-----------------------------------------------------------|--------------------------------------------|---------------------------------------------|
| ADP low 1<br>mean (SD)          | Max aggregation to 3µM<br>67.4% (24.9%)                   | Max aggregation to 2µM<br>42.8% (26.2%)    | Max aggregation to 2µM<br>39.1% (21.7%)     |
| ADP high 1<br>mean (SD)         | Max aggregation to 5µM<br>77.4% (18.7%)                   | Max aggregation to 10µM<br>78.4% (14.3%)   | Max aggregation to 10µM<br>68.3% (12.6%)    |
| ADP low 2<br>mean (SD)          | Threshold dose for >50%<br>aggregation<br>3.3 uM (1.5 uM) | Max aggregation to 2µM<br>42.8% (26.2%)    | Max aggregation to 2µM<br>39.1% (21.7%)     |
| ADP high 2<br>mean (SD)         | Threshold dose for >50%<br>aggregation<br>3.3 uM (1.5 uM) | Max aggregation to 10µM<br>78.4% (14.3%)   | Max aggregation to 10µM<br>68.3% (12.6%)    |
| Epi low 1<br>mean (SD)          | Max aggregation to 1µM<br>57.1% (31.2%)                   | Max aggregation to 2µM<br>54.0% (33.7%)    | Max aggregation to 10µM<br>62.3% (25.2%)    |
| Epi high 1<br>mean (SD)         | Max aggregation to 3µM<br>65.9% (28.5%)                   | Max aggregation to 10µM<br>69.7% (28.6%)   | Max aggregation to 10µM<br>62.3% (25.2%)    |
| Epi low 2<br>mean (SD)          | Threshold dose for >50%<br>aggregation<br>2.0 uM (2.9 uM) | Max aggregation to 2µM<br>54.0% (33.7%)    | Max aggregation to 10µM<br>62.3% (25.2%)    |
| Epi high 2<br>mean (SD)         | Threshold dose for >50%<br>aggregation<br>2.0 uM (2.9 uM) | Max aggregation to 10µM<br>69.7% (28.6%)   | Max aggregation to 10µM<br>62.3% (25.2%)    |
| Collagen<br>group1<br>mean (SD) | Lag time to 190 µg/mL*<br>81.9 sec (19.9 sec)             | Lag time to 1µg/mL**<br>156 sec (90.3 sec) | Lag time to 1µg/mL**<br>58.4 sec (23.9 sec) |
| Collagen<br>group2<br>mean (SD) | Lag time to 190 µg/mL<br>81.9 sec (19.9 sec)              | Lag time to 2µg/mL<br>106 sec (63.0 sec)   | Lag time to 2µg/mL<br>49.2 sec (16.3 sec)   |
| Collagen<br>group3<br>mean (SD) | Lag time to 190 µg/mL<br>81.9 sec (19.9sec )              | Lag time to 5µg/mL<br>71.9 sec (35.8 sec)  | Lag time to 5µg/mL<br>38.5 sec (11.1 sec)   |
| Collagen<br>group4<br>mean (SD) | Lag time to 190 µg/mL<br>81.9 sec (19.9 sec)              | Lag time to 10µg/mL<br>61.8 sec (23.8 sec) | Lag time to 10µg/mL<br>33.1 sec (10.1 sec)  |

\*Collagen was obtained from Bio-Data Corp (Horsham, PA)

\*\*Collagen was obtained from Chrono-Log Corp (Havertown, PA)
