# Supplementary material
Source: publisher figshare collection journal article supplement (https://tandf.figshare.com/articles/dataset/_/5645449)
Supplement: Supplementary file 6 [file 1]

**Supplemental Table 5.** SNV associations confirming prior reported genome-wide significant findings<sup>4</sup>.

| gene/region             | chr:pos      | dbSNPId    | translational effect | Phenotype   | N    | AF    | beta    | p-value  | direction |
|-------------------------|--------------|------------|----------------------|-------------|------|-------|---------|----------|-----------|
| <i>PEAR1</i>            | 1:156869047  | rs12566888 | intronic             | ADP low1    | 4047 | 0.098 | -0.2708 | 1.26E-12 | ---       |
|                         |              |            |                      | ADP low2    | 3697 | 0.095 | -0.2828 | 2.53E-12 | ---       |
|                         |              |            |                      | ADP high2   | 3794 | 0.095 | -0.2317 | 5.84E-09 | ---       |
|                         |              |            |                      | Epi low1    | 3607 | 0.096 | -0.2688 | 3.27E-11 | ---       |
|                         |              |            |                      | Epi low2    | 3797 | 0.094 | -0.2913 | 2.98E-13 | ---       |
|                         |              |            |                      | Epi high2   | 3798 | 0.094 | -0.2751 | 6.15E-12 | ---       |
| <i>JMJD1C</i>           | 10:65027610  | rs10761731 | intronic             | Epi low2    | 3797 | 0.428 | 0.1231  | 3.35E-07 | ++-       |
|                         |              |            |                      | Epi high2   | 3798 | 0.428 | 0.1290  | 9.72E-08 | ++-       |
| <i>ADRA2A</i>           | 10:112922409 | rs4545476  | intergenic           | Epi low1    | 3607 | 0.375 | -0.1437 | 1.44E-08 | ---       |
|                         |              |            |                      | Epi low2    | 3797 | 0.377 | -0.1256 | 3.78E-07 | ---       |
| <i>ADRA2A</i>           | 10:112909105 | rs869244   | intergenic           | Epi low1    | 3607 | 0.330 | -0.1400 | 7.59E-08 | ---       |
|                         |              |            |                      | Epi low2    | 3797 | 0.331 | -0.1354 | 9.77E-08 | ---       |
| <i>GP6</i>              | 19:55526345  | rs1671152  | nonsynonymous        | Collagen 1  | 3753 | 0.835 | -0.1988 | 1.01E-09 | --+       |
|                         |              |            |                      | Collagen 2  | 3753 | 0.835 | -0.1979 | 1.44E-09 | ---       |
|                         |              |            |                      | Collagen 5  | 3753 | 0.835 | -0.1810 | 2.33E-08 | --+       |
|                         |              |            |                      | Collagen 10 | 3742 | 0.835 | -0.1938 | 2.71E-09 | --+       |
| <i>PIK3CG</i><br>region | 7:106372219  | rs342293   | intergenic           | Epi high2   | 3798 | 0.435 | -0.1212 | 3.24E-07 | ---       |
|                         |              |            |                      | Epi low2    | 3797 | 0.435 | -0.1208 | 3.33E-07 | ---       |
