# Supplementary material
Source: publisher figshare collection journal article supplement (https://tandf.figshare.com/articles/dataset/_/5645449)
Supplement: Supplementary file 7 [file 1]

**Supplemental Table 2.** Gene-based analysis suggestive signals (P<1.0E-04).

| phenotype   | gene        | N    | pval    | no.<br>site | beta   | se    | direction.burden<br>.by.study | direction.meta<br>.single.var | test     |
|-------------|-------------|------|---------|-------------|--------|-------|-------------------------------|-------------------------------|----------|
| ADP high 1  | ABCG1       | 3275 | 3.49E-6 | 2           | -2.417 | 0.498 | --=                           | --                            | VT       |
| Epi high 1  | ZNF197      | 2730 | 7.06E-6 | 4           | 1.196  | 0.258 | ++=                           | ++++                          | VT       |
| Collagen 1  | SPATA4      | 3753 | 1.02E-5 | 1           | 1.598  | 0.131 | =+=                           | +                             | VT       |
| Collagen 2  | SPATA4      | 3753 | 1.02E-5 | 1           | 1.598  | 0.131 | =+=                           | +                             | VT       |
| Collagen 10 | SPATA4      | 3742 | 1.02E-5 | 1           | 1.598  | 0.131 | =+=                           | +                             | VT       |
| Collagen 3  | SPATA4      | 3753 | 1.02E-5 | 1           | 1.598  | 0.131 | =+=                           | +                             | VT       |
| Collagen 1  | SPATA4      | 3753 | 1.02E-5 | 1           | 1.598  | 0.131 | =+=                           | +                             | SKA<br>T |
| Collagen 2  | SPATA4      | 3753 | 1.02E-5 | 1           | 1.598  | 0.131 | =+=                           | +                             | SKA<br>T |
| Collagen 10 | SPATA4      | 3742 | 1.02E-5 | 1           | 1.598  | 0.131 | =+=                           | +                             | SKA<br>T |
| Collagen 3  | SPATA4      | 3753 | 1.02E-5 | 1           | 1.598  | 0.131 | =+=                           | +                             | SKA<br>T |
| ADP high 1  | TPR         | 3275 | 1.22E-5 | 10          | -0.019 | 0.119 | +-=                           | -+---++                       | SKA<br>T |
| ADP high 2  | ZNF610      | 3794 | 1.58E-5 | 5           | -0.292 | 0.086 | -+-                           | ---+-                         | SKA<br>T |
| ADP low 2   | ZNF25       | 3697 | 1.87E-5 | 1           | 2.963  | 0.479 | +=                            | +                             | VT       |
| ADP low 2   | ZNF25       | 3697 | 1.87E-5 | 1           | 2.963  | 0.479 | +=                            | +                             | SKA<br>T |
| Epi high 1  | LAPTM4<br>B | 2730 | 1.87E-5 | 5           | 1.356  | 0.306 | ++=                           | +++++                         | VT       |
| ADP low 1   | ANKRD2<br>6 | 4047 | 2.07E-5 | 12          | 0.343  | 0.103 | -+=                           | +++---++                      | SKA<br>T |
| Collagen 10 | COL4A2      | 3742 | 2.28E-5 | 11          | -0.708 | 0.159 | --=                           | -----                         | VT       |
| ADP low 1   | ABCC9       | 4047 | 2.39E-5 | 4           | 1.629  | 0.363 | ++=                           | ++++                          | VT       |
| Collagen 1  | HAUS3       | 3753 | 3.68E-5 | 3           | -1.623 | 0.364 | --=                           | ---                           | VT       |
| ADP low 1   | MICU1       | 4047 | 4.06E-5 | 2           | -1.538 | 0.382 | --=                           | --                            | SKA<br>T |
| Epi high 1  | SLCO2B1     | 2730 | 4.09E-5 | 7           | -0.369 | 0.285 | -+=                           | ++---+                        | SKA<br>T |
| Epi high 1  | ZNF197      | 2730 | 4.63E-5 | 4           | 1.196  | 0.258 | ++=                           | ++++                          | SKA<br>T |
| ADP high 1  | ZNF610      | 3275 | 5.61E-5 | 6           | -0.320 | 0.089 | -+-                           | ---+-                         | SKA<br>T |
| ADP high 2  | LEFTY1      | 3794 | 6.13E-5 | 1           | 1.422  | 0.126 | ++=                           | +                             | VT       |
| ADP high 2  | LEFTY1      | 3794 | 6.13E-5 | 1           | 1.422  | 0.126 | ++=                           | +                             | SKA<br>T |
| Epi high 1  | RLBP1       | 2730 | 6.85E-5 | 3           | 0.969  | 0.272 | +++                           | -++                           | SKA<br>T |
| Collagen 1  | SLC6A16     | 3753 | 7.04E-5 | 13          | 0.329  | 0.108 | +++                           | +++---++                      | SKA<br>T |
| Epi low 2   | ASIC5       | 3797 | 7.21E-5 | 9           | -0.898 | 0.211 | +-=                           | -----+                        | VT       |

|            |             |      |         |    |        |       |     |                         |          |
|------------|-------------|------|---------|----|--------|-------|-----|-------------------------|----------|
| ADP high 1 | DDX60       | 3275 | 7.52E-5 | 8  | 0.584  | 0.175 | ++= | ++++---++               | SKA<br>T |
| Epi high 2 | RLBP1       | 3798 | 8.20E-5 | 3  | 0.981  | 0.238 | +++ | +++                     | VT       |
| ADP high 1 | RAB25       | 3275 | 8.25E-5 | 3  | -1.118 | 0.299 | =-- | +--                     | SKA<br>T |
| Epi high 1 | TXNIP       | 2730 | 8.39E-5 | 1  | -2.891 | 0.706 | =-- | -                       | VT       |
| Epi low 2  | DYNC2H<br>1 | 3797 | 8.52E-5 | 20 | 0.821  | 0.187 | ++= | -+++++++++-<br>+-----++ | VT       |
| ADP high 2 | GJA9        | 3794 | 8.90E-5 | 3  | 1.734  | 0.414 | ++= | +++                     | VT       |
| Epi high 1 | DIRC1       | 2730 | 8.91E-5 | 3  | -0.558 | 0.137 | --- | ---                     | SKA<br>T |
| Epi high 1 | RLBP1       | 2730 | 9.32E-5 | 2  | 1.198  | 0.295 | +++ | ++                      | VT       |
| ADP low 1  | SLC6A17     | 4047 | 9.54E-5 | 3  | 2.343  | 0.577 | =+= | +++                     | VT       |
| Epi low 2  | LIM2        | 3797 | 9.60E-5 | 3  | 1.199  | 0.289 | ++= | +++                     | VT       |
